# Supplementary material for: GelMA Hydrogel Reinforced with 3D Printed PEGT/PBT Scaffolds for Supporting Epigenetically-Activated Human Bone Marrow Stromal Cells for Bone Repair
Source: MDPI journal article supplement (doi:10.3390/jfb13020041), 2022-04-10
Supplement: s1 [file s1]

Supplementary Materials

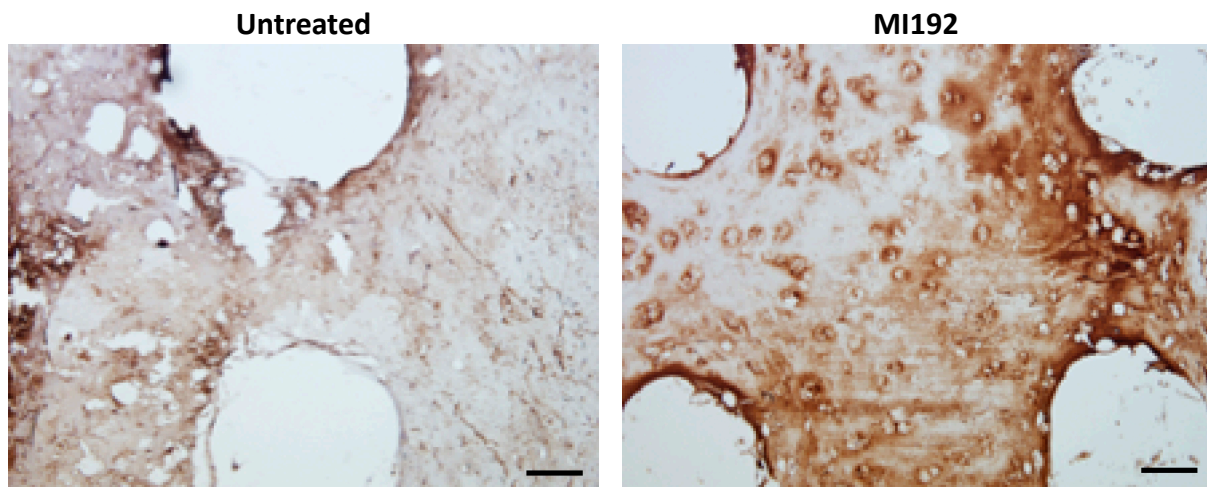

**Figure S1.** Immunohistochemical staining for Col1a deposition in untreated/MI192-pre-treated hBMSCs within GelMA-PEGT/PBT constructs after 6 weeks of osteogenic culture. Scale bars = 100  $\mu$ m.
